# Supplementary material
Source: PubMed Central journal article supplement (PMC6567845)
Supplement: jamaoncol-5-1132-s002.pdf [file jamaoncol-5-1132-s002.pdf]

## Supplementary Online Content

Vinayak S, Tolaney SM, Schwartzberg L, et al. Open-label clinical trial of niraparib combined with pembrolizumab for treatment of advanced or metastatic triple-negative breast cancer. *JAMA Oncol*. Published online June 13, 2019.  
doi:10.1001/jamaoncol.2019.1029

**eMethods.** Inclusion/Exclusion Criteria and Further Information

**eTable 1.** Patient Demographics and Baseline Characteristics

**eTable 2.** Biomarker Status

**eTable 3.** Disease Control in tBRCAwt/Unknown Patients

**eTable 4.** ORR Subgroup Analysis in Efficacy Evaluable Population

**eTable 5.** ORR Analysis by Biomarker Status and Prior Platinum Use

**eFigure.** Duration of Response for All Patients Who Achieved Confirmed CR or PR

**eReferences.**

This supplementary material has been provided by the authors to give readers additional information about their work.

## **eMethods. Inclusion/Exclusion Criteria and Further Information**

### **Inclusion/exclusion criteria**

Eligible patients were aged  $\geq 18$  years with advanced or metastatic breast cancer that was estrogen receptor–negative, progesterone receptor–negative, and HER2–negative, as per American Society of Clinical Oncology/College of American Pathologists guidelines<sup>1,2</sup>; had measurable lesions by Response Evaluation Criteria in Solid Tumors (RECIST) v1.1; Eastern Cooperative Oncology Group performance status of 0–1; had adequate organ function; and may have received  $\leq 2$  lines of cytotoxic therapy, not counting adjuvant or neoadjuvant therapies, targeted small molecules, hormonal agents, or bevacizumab. Patients could have received platinum chemotherapy in the metastatic setting. However, the protocol was amended such that patients who progressed within 8 weeks from the day of last platinum administration were excluded. Patients were eligible regardless of their *tBRCAmut* status. Patients with previously treated brain metastases were eligible, provided that they were stable for at least 4 weeks prior to the first dose of the study treatment. Patients were excluded if they had undergone prior treatment with an anti-PD-1, anti-PD-L1, or anti PD-L2 agent, or known PARPi; if they had known active central nervous system metastases or carcinomatous meningitis; known additional malignancies that progressed or required active treatment in the past 2 years (except basal cell carcinoma of the skin, squamous cell carcinoma of the skin that has undergone potentially curative therapy, or *in situ* cervical cancer); were considered poor medical risks; or had participated in a study of an investigational agent within 4 weeks of the first dose of treatment.

### **Race**

Information about race was collected given the proclivity of TNBC in the African-American population. Race was determined by the investigator.

### **Radiographic assessments**

The same modality (CT or MRI) was used throughout the study for a given patient. After 1 year of radiographic assessments, patients had imaging performed every 12 weeks ( $84 \pm 7$  days) until disease progression. Tumor imaging for confirmation of response was performed  $\geq 4$  weeks after the first indication of response or at the next scheduled scan (ie, 9 weeks later), whichever was clinically indicated. If a patient discontinued treatment for a reason other than progression or death, withdrawal of consent, or loss to follow-up, scans continued at the specified intervals (ie, every 9 weeks for the first year and every 12 weeks thereafter).

### **Clinical outcomes**

Duration of response was defined as the time from the first assessment of complete response or partial response until the earlier assessment of progression or death by any cause in the absence of progression. Progression-free survival was defined as the time from first dose of study treatment to the earlier of assessment of progression or death by any cause in the absence of progression. Overall survival was defined as the time from first dose of study treatment to the date of death by any cause.

### **Exploratory objectives**

Exploratory objectives were determining clinical activity in biomarker-defined subpopulations and exploring biomarkers that may predict sensitivity or resistance to combination therapy.

### **Safety parameters**

Safety was assessed based on adverse events (AEs), clinical laboratory values, vital signs, electrocardiograms, physical examination findings, and use of concomitant medications.

### **Biomarker testing**

*tBRCAmut* and HRR gene mutational status were evaluated using the Myriad Genetics (Salt Lake City, UT, USA) research assay. *gBRCA* results from local testing performed by individual sites were collected when available. PD-L1 expression was evaluated by Merck & Co., Inc., Kenilworth, NJ, USA; PD-L1 status was determined using a combined proportion score (CPS) provision cutoff of 1 by immunohistochemistry (IHC) using an investigational version of the PD-L1 IHC 22C3 pharmDx (Agilent, Carpinteria, CA, USA). The CPS is the number of positively stained tumor and immune cells relative to the total number of tumor cells.

The following is a list of all participating trial sites:

| <b>Site Name</b>                              | <b>Location</b>     |
|-----------------------------------------------|---------------------|
| Dana Farber Cancer Institute                  | Boston, MA          |
| Massachusetts General Hospital                | Boston, MA          |
| Beth Israel Deaconess Medical Center          | Boston, MA          |
| HonorHealth                                   | Scottsdale, AZ      |
| University of Oklahoma Health Sciences Center | Oklahoma City, OK   |
| Cedars-Sinai Medical Group                    | Los Angeles, CA     |
| University Hospitals Case Medical Center      | Cleveland, OH       |
| Karmanos Cancer Institute                     | Detroit, MI         |
| West Cancer Center                            | Memphis, TN         |
| Women's Cancer Care                           | Covington, LA       |
| Mayo Clinic - Rochester                       | Rochester, MN       |
| Florida Hospital Cancer Institute             | Orlando, FL         |
| University of Alabama at Birmingham           | Birmingham, AL      |
| University of Virginia Cancer Center          | Charlottesville, VA |
| University of California San Francisco        | San Francisco, CA   |
| Mayo Clinic - Jacksonville                    | Jacksonville, FL    |
| Lahey Hospital & Medical Center               | Burlington, MA      |
| Monter Cancer Center                          | Lake Success, NY    |
| Stanford University Medical School            | Palo Alto, CA       |

|                                                          |                 |
|----------------------------------------------------------|-----------------|
| Tennessee Oncology - Centennial Clinic                   | Nashville, TN   |
| Levine Cancer Institute                                  | Charlotte, NC   |
| University of North Carolina - Chapel Hill               | Chapel Hill, NC |
| Weill Cornell Medical College of Cornell University      | New York        |
| Tufts Medical Center                                     | Boston, NY      |
| Sylvester Comprehensive Cancer Center                    | Miami, FL       |
| Sylvester Comprehensive Cancer Center – Deerfield Beach  | Miami, FL       |
| Sylvester Comprehensive Cancer Center – Plantation       | Miami, FL       |
| University of Chicago Medical Center                     | Chicago, IL     |
| Northside Hospital Cancer Center                         | Atlanta, GA     |
| University of Texas Health Science Center at San Antonio | San Antonio, TX |
| Morristown Memorial Hospital                             | Morristown, NJ  |
| Mayo Clinic – Scottsdale                                 | Scottsdale, AZ  |
| University of Washington                                 | Seattle, WA     |
| Georgetown University Medical Center                     | Washington, DC  |

**eTable 1. Patient Demographics and Baseline Characteristics**

| Characteristic                                                                             | Full Analysis<br>(N=55) | Efficacy-<br>Evaluable<br>(N=47) |
|--------------------------------------------------------------------------------------------|-------------------------|----------------------------------|
| Age, median (range), years                                                                 | 54 (32-90)              | 53 (32-90)                       |
| Race, n (%)                                                                                |                         |                                  |
| White                                                                                      | 43 (78)                 | 36 (77)                          |
| Black                                                                                      | 8 (15)                  | 7 (15)                           |
| Asian                                                                                      | 2 (4)                   | 2 (4)                            |
| Not Reported                                                                               | 2 (4)                   | 2 (4)                            |
| ECOG performance status, n (%)                                                             |                         |                                  |
| 0                                                                                          | 30 (55)                 | 27 (57)                          |
| 1                                                                                          | 25 (45)                 | 20 (43)                          |
| Prior lines of therapy in advanced/metastatic setting, median (range) <sup>a</sup> , n (%) | 1 (0-3)                 | 1 (0-3)                          |
| 0                                                                                          | 18 (33)                 | 17 (36)                          |
| 1                                                                                          | 22 (40)                 | 16 (34)                          |
| 2                                                                                          | 14 (25)                 | 13 (28)                          |
| 3 <sup>b</sup>                                                                             | 1 (2)                   | 1 (2)                            |
| Previous neoadjuvant or adjuvant therapy <sup>c</sup> , n (%)                              | 43 (78)                 | 37 (79)                          |
| Previous chemotherapy in advanced/metastatic setting, n (%)                                |                         |                                  |
| Platinum                                                                                   | 21 (38)                 | 17 (36)                          |
| Taxane                                                                                     | 15 (27)                 | 11 (23)                          |
| Gemcitabine                                                                                | 14 (25)                 | 12 (26)                          |
| Capecitabine                                                                               | 12 (22)                 | 10 (21)                          |
| Eribulin                                                                                   | 7 (13)                  | 7 (15)                           |
| Anthracycline                                                                              | 4 (7)                   | 4 (9)                            |
| Cyclophosphamide                                                                           | 3 (5)                   | 3 (6)                            |
| Ixabepilone                                                                                | 1 (2)                   | 1 (2)                            |
| Lactate dehydrogenase, median (range), units/L                                             | 221 (106-4047)          | 214 (106-4047)                   |

Abbreviations: ECOG, Eastern Cooperative Oncology Group.

<sup>a</sup> Not including small molecules, hormonal agents, monoclonal antibodies, or investigational agents.

<sup>b</sup> Patient was retrospectively determined to have received 3 prior regimens.

<sup>c</sup> Any type of anti-cancer therapy including but not limited to chemotherapy, biologics or hormones.

**eTable 2. Biomarker Status**

| <b>Biomarker Status</b>                               | <b>Full Analysis<br/>(N=55)</b> | <b>Efficacy Evaluable<br/>(N=47)</b> |
|-------------------------------------------------------|---------------------------------|--------------------------------------|
| <b><i>BRCA</i> status, n (%)</b>                      |                                 |                                      |
| <i>tBRCA</i> mut                                      | 15 (27)                         | 15 (32)                              |
| <i>gBRCA</i> mut                                      | 8 (15)                          | 8 (17)                               |
| <i>sBRCA</i> mut ( <i>gBRCA</i> wt/ <i>tBRCA</i> mut) | 2 (4)                           | 2 (4)                                |
| <i>gBRCA</i> unk/ <i>tBRCA</i> mut                    | 5 (9)                           | 5 (11)                               |
| <i>tBRCA</i> wt                                       | 34 (62)                         | 27 (57)                              |
| <i>tBRCA</i> Unknown                                  | 6 (11)                          | 5 (11)                               |
| <b>HRR status, n (%)</b>                              |                                 |                                      |
| HRRmut                                                | 21 (38)                         | 20 (43)                              |
| HRRwt                                                 | 28 (51)                         | 22 (47)                              |
| HRR Unknown                                           | 6 (11)                          | 5 (11)                               |
| <b>PD-L1 status, n (%)</b>                            |                                 |                                      |
| Positive                                              | 36 (65)                         | 28 (60)                              |
| Negative                                              | 13 (24)                         | 13 (28)                              |
| Unknown                                               | 6 (11)                          | 6 (13)                               |

Abbreviations: *gBRCA*, germline *BRCA*; HRR, homologous recombination repair; mut, mutation; PD-L1, programmed death-ligand 1; *sBRCA*, somatic *BRCA*; *tBRCA*, tumor *BRCA*; unk; unknown; wt, wild-type.

**eTable 3. Disease Control in tBRCAwt/Unknown Patients<sup>a</sup>**

| HRR/DDR Mutations <sup>b</sup> | PD-L1 Status | Best Response | PFS (Months)      |
|--------------------------------|--------------|---------------|-------------------|
| <i>CHEK1</i>                   | +            | CR            | 18.0 <sup>c</sup> |
| <i>ATR</i>                     | +            | CR            | 6.4               |
| <i>BLM</i>                     | -            | SD            | 8.1               |
| <i>NBN &amp; RAD51C</i>        | +            | SD            | 4.9               |
| <i>PALB-2</i> <sup>d</sup>     | UNK          | SD            | 3.6               |
| None detected                  | -            | CR            | 10.3              |
| None detected                  | -            | SD            | 8.2               |
| None detected                  | -            | SD            | 4.2               |
| None detected                  | -            | SD            | 3.9               |
| None detected                  | +            | SD            | 1.4               |

Abbreviations: CR, complete response; DDR, DNA damage response; PD-L1, programmed death-ligand 1; PFS, progression-free survival; PR, partial response; RECIST, Response Evaluation Criteria in Solid Tumors; SD, stable disease; tBRCA, tumor BRCA; wt, wild type.

<sup>a</sup> Disease control defined as the proportion of patients achieving CR, PR, or SD as per RECIST v1.1. One patient with no tumor sample is not shown.

<sup>b</sup> HRR mutations: *ATR*, *BLM*, *NBN*, *RAD51C*, and *PALB-2*; DDR mutation: *CHEK1*

<sup>c</sup> Treatment is ongoing.

<sup>d</sup> gBRCAwt, tBRCA status unknown. The other 9 patients were all tBRCAwt.

**eTable 4. ORR Subgroup Analysis in Efficacy Evaluable Population**

| <b>Patient Population</b>   | <b>n/N</b> | <b>ORR<sup>a</sup> (90% CI)</b> |
|-----------------------------|------------|---------------------------------|
| All patients                | 10/47      | 21% (12–33)                     |
| Lines of previous treatment |            |                                 |
| 0-1                         | 9/33       | 27% (15–43)                     |
| ≥2                          | 1/14       | 7% (0.4–30)                     |
| tBRCA status                |            |                                 |
| tBRCAmut                    | 7/15       | 47% (24–70)                     |
| tBRCAwt                     | 3/27       | 11% (3–26)                      |
| Unknown                     | 0/5        | 0% (0–45)                       |
| Prior platinum status       |            |                                 |
| None                        | 7/21       | 33% (17–54)                     |
| Yes                         | 3/26       | 12% (3–27)                      |
| PFI ≤56 days                | 1/14       | 7% (0.4–30)                     |
| PFI >56 days                | 2/12       | 17% (3–44)                      |
| PD-L1 status                |            |                                 |
| Positive                    | 9/28       | 32% (18–49)                     |
| Negative                    | 1/13       | 8% (0.4–32)                     |
| Unknown                     | 0/6        | 0% (0.0–39)                     |

<sup>a</sup> ORR includes only confirmed responses using RECIST v1.1

Abbreviations: CI, confidence interval; ORR, objective response rate; PD-L1, programmed death-ligand 1; PFI, platinum-free interval; mut, mutation; t, tumor; wt, wild type.



**eTable 5. ORR Analysis by Biomarker Status and Prior Platinum Use**

| <b>Biomarker Status</b> | <b>ORR<sup>a</sup> with Prior Platinum Use, n/N (% [90% CI])</b> | <b>ORR<sup>a</sup> Without Prior Platinum Use, n/N (% [90% CI])</b> |
|-------------------------|------------------------------------------------------------------|---------------------------------------------------------------------|
| tBRCAmut                | 0/5 (0% [0–45])                                                  | 7/10 (70% [39–91])                                                  |
| tBRCAwt                 | 3/19 (16% [4–36])                                                | 0/8 (0% [0–31])                                                     |
| tBRCA unknown           | 0/2 (0% [0–78])                                                  | 0/3 (0% [0–63])                                                     |
|                         |                                                                  |                                                                     |
| HRRmut                  | 1/7 (14% [1–52])                                                 | 7/13 (54% [29–78])                                                  |
| HRRwt                   | 2/16 (13% [2–34])                                                | 0/6 (0% [0–39])                                                     |
| HRR unknown             | 0/3 (0% [0–63])                                                  | 0/2 (0% [0–78])                                                     |
|                         |                                                                  |                                                                     |
| PD-L1 positive          | 2/16 (13% [2–34])                                                | 7/12 (58% [32–82])                                                  |
| PD-L1 negative          | 1/8 (13% [1–47])                                                 | 0/5 (0% [0–45])                                                     |
| PD-L1 unknown           | 0/2 (0% [0–78])                                                  | 0/4 (0% [0–53])                                                     |

<sup>a</sup>ORR includes only confirmed responses using RECIST v1.1

Abbreviations: CI, confidence interval; ORR, objective response rate; PD-L1, programmed death-ligand 1; mut, mutation; t, tumor; wt, wild type.

**eFigure. Duration of Response for All Patients Who Achieved Confirmed CR or PR**

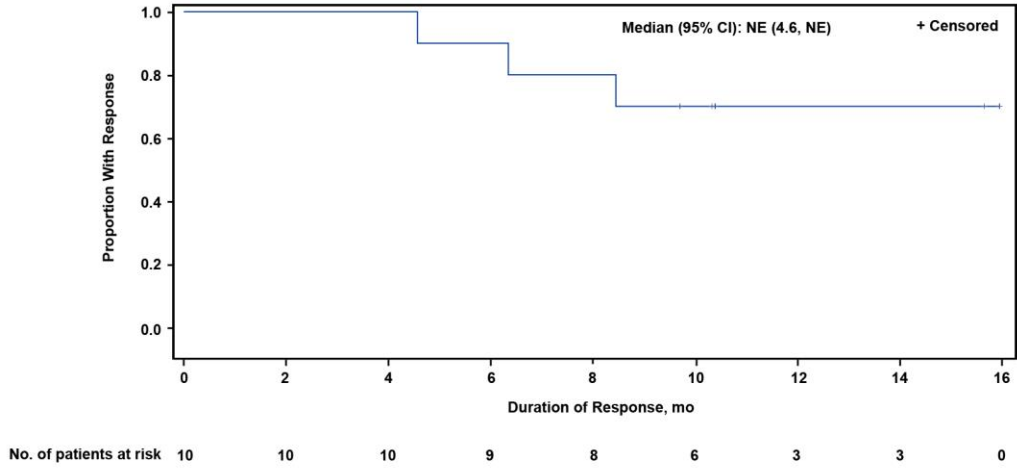

## **eReferences**

1. Wolff AC, Hammond ME, Hicks DG, et al. Recommendations for human epidermal growth factor receptor 2 testing in breast cancer: American Society of Clinical Oncology/College of American Pathologists clinical practice guideline update. *J Clin Oncol*. 2013;31(31):3997-4013.
2. Hammond ME, Hayes DF, Dowsett M, et al. American Society of Clinical Oncology/College of American Pathologists guideline recommendations for immunohistochemical testing of estrogen and progesterone receptors in breast cancer (unabridged version). *Arch Pathol Lab Med*. 2010;134(7):e48-72.
